# Supplementary material for: Genome-Wide Analysis of the WOX Transcription Factor Genes in Dendrobium catenatum Lindl.
Source: MDPI journal article supplement (doi:10.3390/genes13081481), 2022-08-19
Supplement: s1 [file s1]

**Table S1:** The accession of *AtWOX* genes.

| Gene    | Accession |
|---------|-----------|
| ATWUS   | AT2G17950 |
| ATWOX1  | AT3G18010 |
| ATWOX2  | AT5G59340 |
| ATWOX3  | AT2G28610 |
| ATWOX4  | AT1G46480 |
| ATWOX5  | AT3G11260 |
| ATWOX6  | AT2G01500 |
| ATWOX7  | AT5G05770 |
| ATWOX8  | AT5G45980 |
| ATWOX9  | AT2G33880 |
| ATWOX10 | AT1G20710 |
| ATWOX11 | AT3G03660 |
| ATWOX12 | AT5G17810 |
| ATWOX13 | AT4G35550 |
| ATWOX14 | AT1G20700 |

**Table S2:** The primer sequences of *DcaWOXs*' CDS.

| Primer Name       | Sequence (5' to 3')                     |
|-------------------|-----------------------------------------|
| DcaWOX2-SalI-F    | GCAGCGGCCGTCGACATGGAAGAGGAGAAGC         |
| DcaWOX2-EcoRI-R   | GTTGATTCAGAATTCTTAGCTCCGTTATCACC        |
| DcaWOX3a-SalI-F   | GCAGCGGCCGTCGACATGCCTCAAGTTCCATC        |
| DcaWOX3a-EcoRI-R  | GTTGATTCAGAATTCTTAGTTGGTGGAAAGCTGAGC    |
| DcaWOX5-SalI-F    | GCAGCGGCCGTCGACTGTGCAACAGCAGAGTG        |
| DcaWOX5-EcoRI-R   | GTTGATTCAGAATTCTTAGAAGAAGCCCAAGGAGAGG   |
| DcaWOX9-SalI-F    | GCAGCGGCCGTCGACATGGCTTCATCAAACAGGCACTGG |
| DcaWOX9-EcoRI-R   | GTTGATTCAGAATTCATAGGATGCTCCATGCTG       |
| DcaWOX11b-SalI-F  | GCAGCGGCCGTCGACGGACAATAACAAACCCCC       |
| DcaWOX11b-EcoRI-R | GTTGATTCAGAATTCCTTTCACCCATCTG           |
| DcaWOX13a-SalI-F  | GCAGCGGCCGTCGACATGGCATGGGAAAG           |
| DcaWOX13a-EcoRI-R | GTTGATTCAGAATTCAACTCAAATCGCACGCC        |
